# Supplementary material
Source: PubMed Central journal article supplement (PMC4528240)
Supplement: supp_M115.050393_mcp.M115.050393-3.pdf [file supp_M115.050393_mcp.M115.050393-3.pdf]

Supplemental Figures for the article “Tissue-specific glycosylation at the glycopeptide level”

written by K.F. Medzihradzsky, K. Kaasik, and R.J. Chalkley.

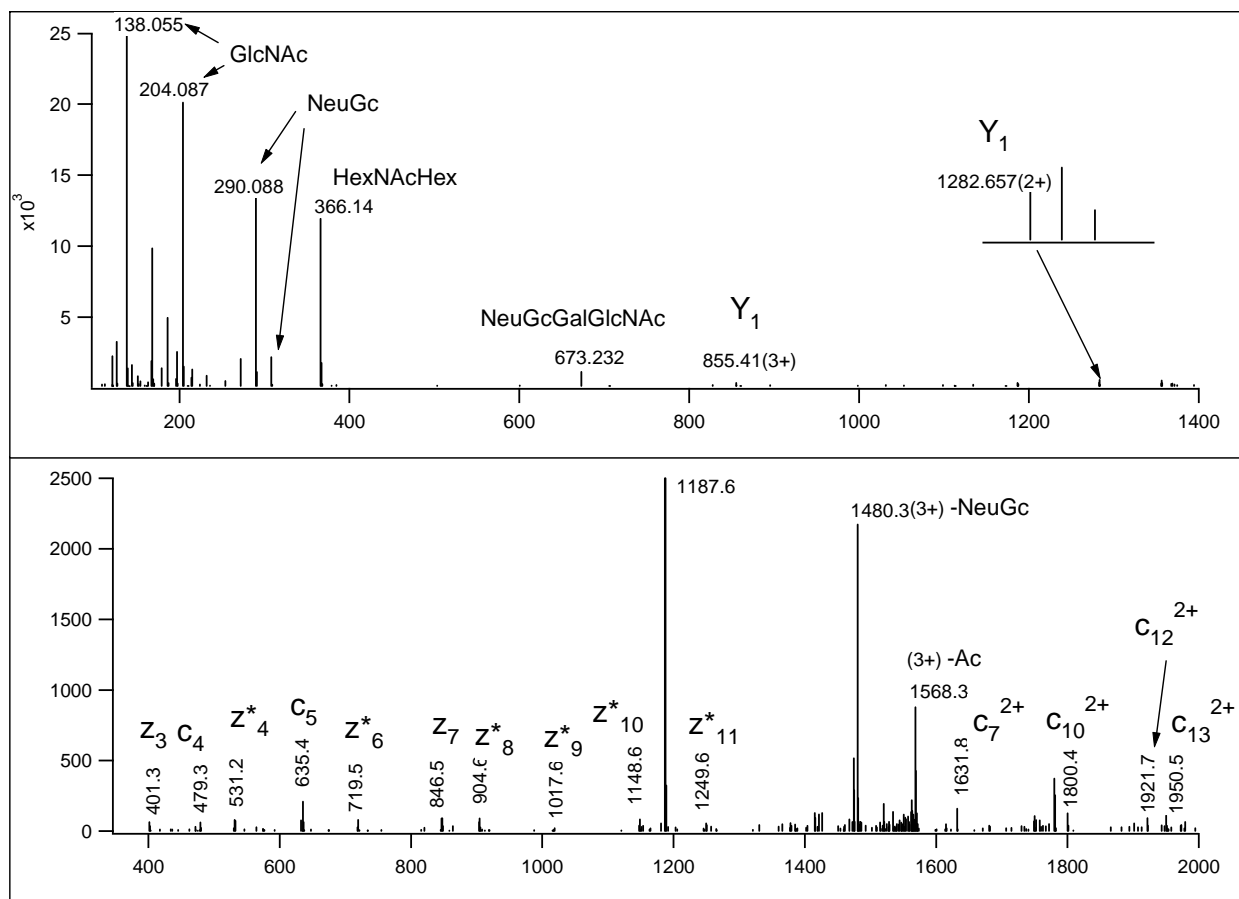

**Supplemental Figure 1.** The HCD and ETD data acquired from a precursor ion at  $m/z$  1186.7532(4+).

$^{125}\text{LGQYRN}(\text{HexNAc}_4\text{Hex}_5\text{FucSAOx}_2)\text{EVHTMLGQSTEEIR}^{144}$ , a non-consensus N-glycopeptide from Apolipoprotein E was identified from these data.  $Y_1$  stands for the peptide retaining the core GlcNAc, and the inset shows its accurate mass measured. [Carbohydrate fragmentation nomenclature: Domon, B., Costello, C.E. (1988) A systematic nomenclature for carbohydrate fragmentations in FAB-MS/MS spectra of glycoconjugates *Glycoconjugate J* 5, 397-409.]. SAOx stands for NeuGc in Protein Prospector.

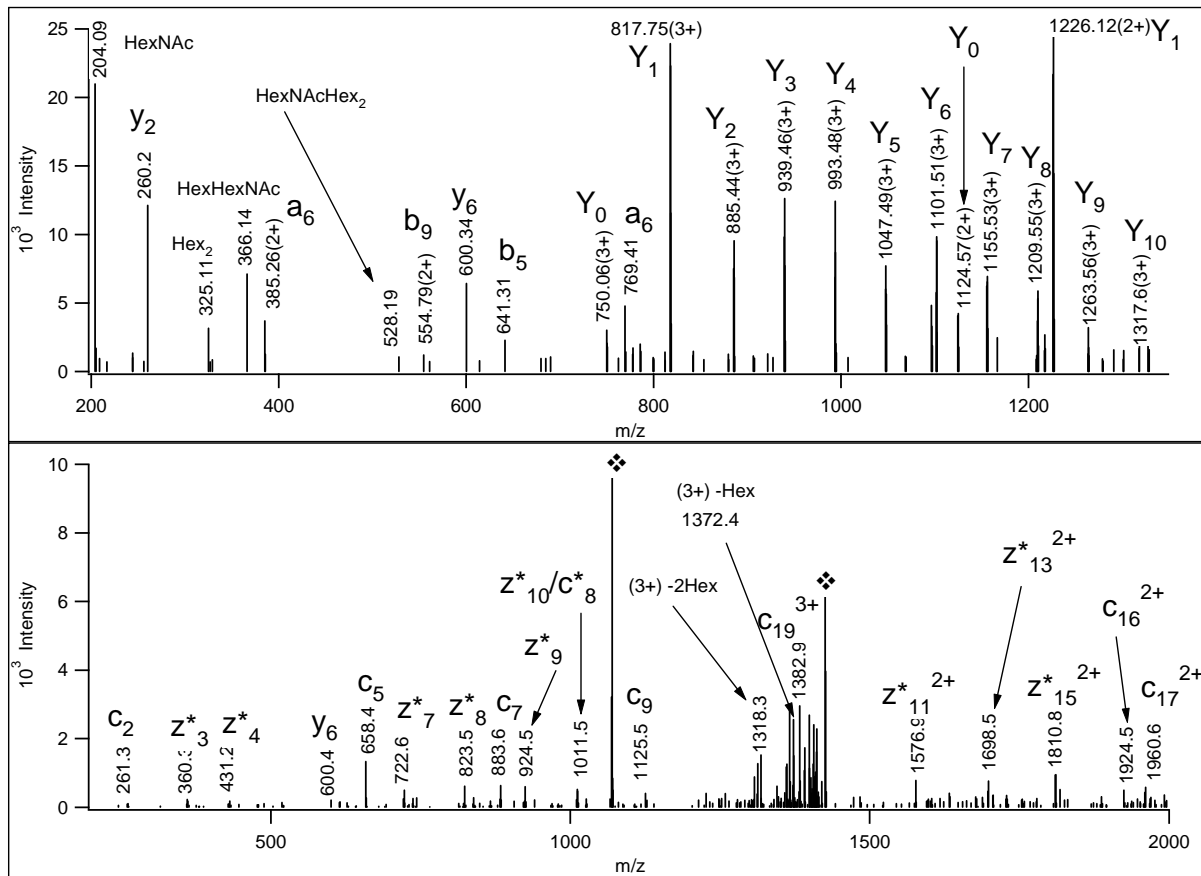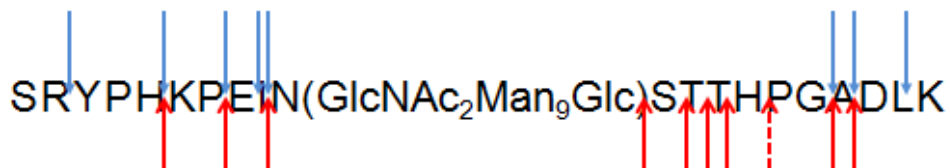

**Supplemental Figure 2.** MS/MS data from m/z 1069.4700(4+), ❖ labels the different charge states of the precursor ion. The ETD data (lower panel) identified prothrombin (P19221) peptide, <sup>135</sup>SRYPHKPEINSTTHPGADLK<sup>154</sup> bearing a 2026.7 Da oligosaccharide at Asn-144. Based on the mass increase the peptide is modified with a HexNAc<sub>2</sub>Hex<sub>10</sub> structure, that is most likely an immature N-linked sugar, the original Man<sub>9</sub> structure still featuring one of the capping Glc units. The blue and red arrows indicate the cleavages leading to the formation of the c and z' fragments detected, respectively. The asterisks label c-1' and z+1 fragments. The HCD data confirmed the identity of the peptide primarily with Y<sub>0</sub> and Y<sub>1</sub> fragments [Domon & Costello] and a few sequence ions were also detected. However, the majority of the fragment ions are the results of glycosidic bond cleavages. The labels starting from Y<sub>5</sub> do not comply with the nomenclature quoted, just simply indicate the presence of one more Hex unit.

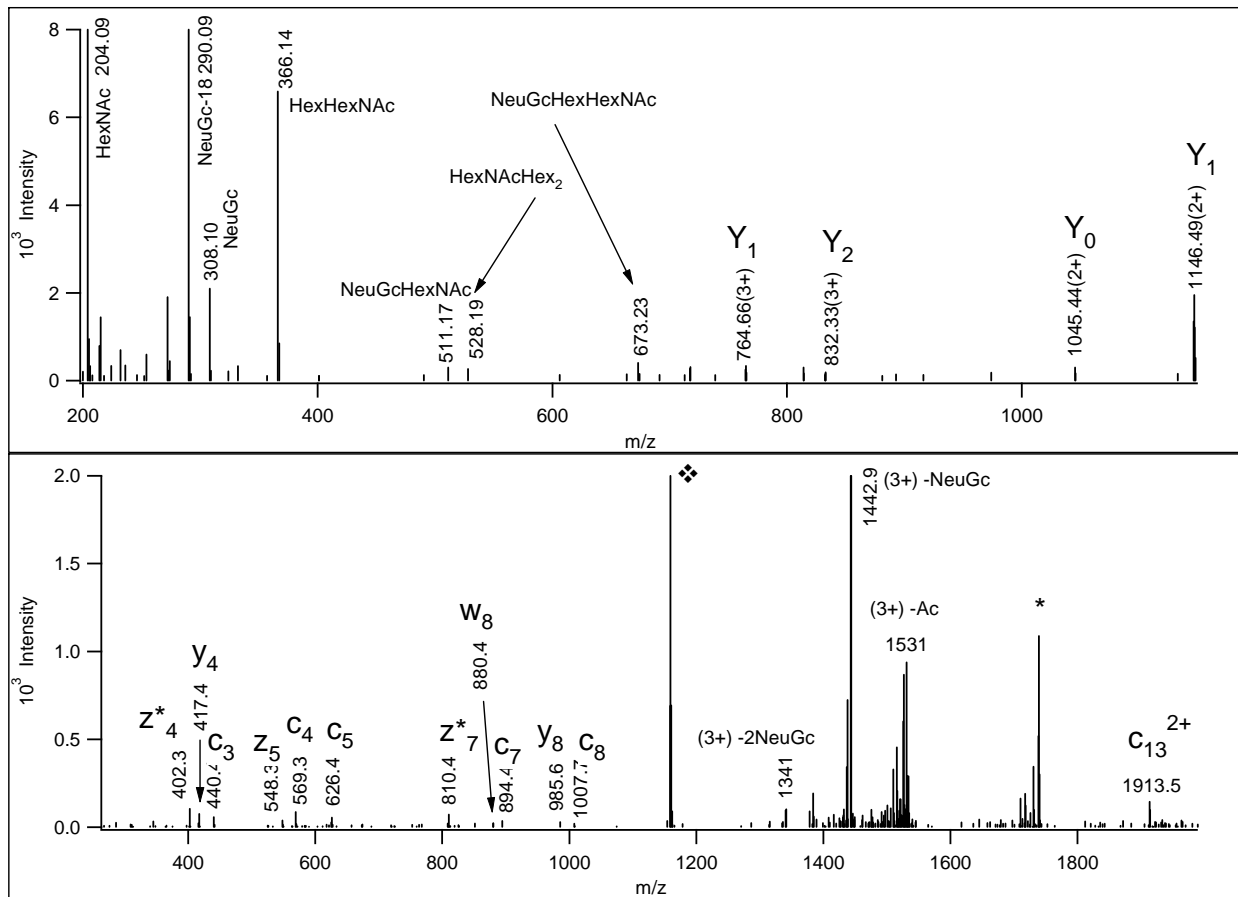

**Supplemental Figure 3.** HCD (upper panel) and ETD (lower panel) data of m/z 1158.9447(4+).

Fibronectin peptide <sup>534</sup>RHEEGHMLNC\*TC\*FGQGR<sup>550</sup>, carrying a trisialo biantennary oligosaccharide (added monoisotopic mass = 2543.8525) was identified from the ETD data. The measured precursor mass is within 3 ppm of the calculated value. The HCD data confirm the peptide's mass in form of Y<sub>0</sub>-Y<sub>2</sub> fragments and also indicate that one of the sialic acids is linked to a HexNAc unit. That indicates a Gal beta 1-3 GlcNAc linkage in one of the antennae, since the sugars with more common Gal beta 1-4 linkage cannot be sialylated on the subterminal GlcNAc. C\* stands for carbamidomethyl Cys.

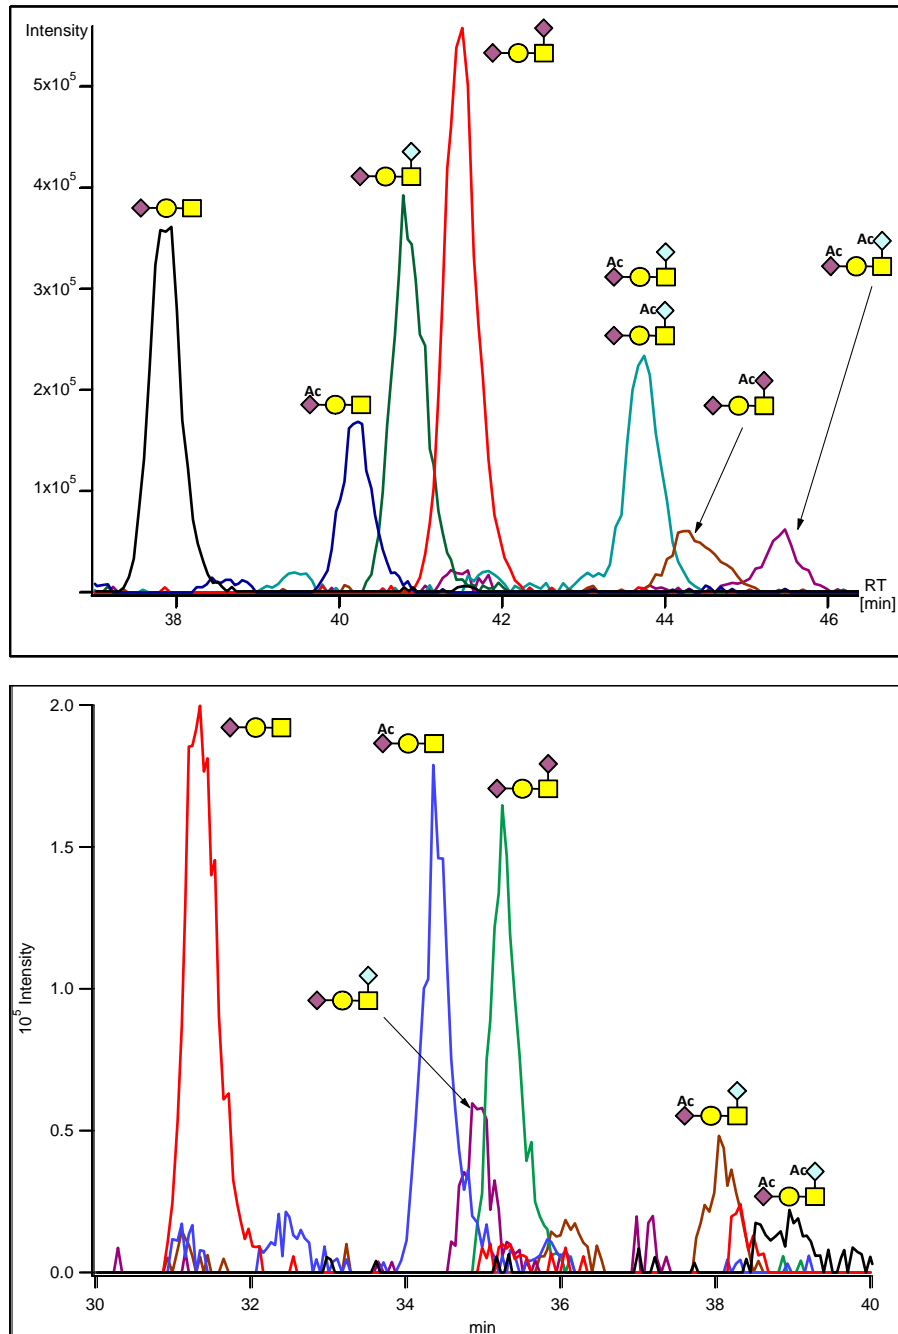

**Supplemental Figure 4. A)** Superimposed extracted ion chromatograms of eight different glycoforms of  $^{31}\text{AAPPQEDSQAgTETPDTGLYHR}^{52}$  from Nucleobindin-1 listed in Supplementary Table 3. Data are normalized to the most abundant component, the glycoform bearing the tetrasaccharide containing 2 NeuAcs. This Figure was reprinted with permission from [Medzihradsky, K.F., Kaasik, K., Chalkley, R.J. (2015) Characterizing sialic acid variants at the glycopeptide level. *Anal Chem.* 87, 3064-3071.] Copyright (2015) American Chemical Society. **B)** Superimposed extracted ion chromatograms of the confidently identified glycoforms of tryptic peptide  $^{399}\text{KQQLQEQgSAPPSKPDGQLQFR}^{419}$  of Nucleobindin-1 listed in Supplementary Table 3, except the heaviest glycoform that was not selected for MS/MS analysis, and was identified only from its accurate mass and chromatographic behavior. The values were normalized to the most abundant glycoform, the one bearing the NeuAcGalGalNAc trisaccharide.
